# Supplementary material for: NF-Y Subunits Overexpression in HNSCC
Source: MDPI journal article supplement (doi:10.3390/cancers13123019), 2021-06-16
Supplement: s1 [file s1]

**NF-Y subunits are overexpressed in HNSCC.**

Eugenia Bezzecchi<sup>1</sup>, Andrea Bernardini<sup>1</sup>, Mirko Ronzio<sup>1</sup>, Claudia Miccolo<sup>2</sup>, Susanna Chiocca<sup>2</sup>, Diletta Dolfini <sup>1</sup>  
and Roberto Mantovani<sup>1\*</sup>.

Dipartimento di Bioscienze, Università degli Studi di Milano, Via Celoria 26, 20133 Milano, Italy.  
Department of Experimental Oncology, IEO, European Institute of Oncology IRCCS, Via Adamello 16, 20139 Milan, Italy.

\* To whom correspondence should be addressed.

Tel. 39-02-50315005

E-mail: mantor@unimi.it

| gene   | MUT samples | PERCENTAGE |
|--------|-------------|------------|
| TP53   | 361         | 71%        |
| TTN    | 246         | 49%        |
| FAT1   | 122         | 24%        |
| MUC16  | 115         | 23%        |
| CSMD3  | 113         | 22%        |
| CDKN2A | 107         | 21%        |
| LRP1B  | 101         | 20%        |
| SYNE1  | 99          | 20%        |
| NOTCH1 | 94          | 19%        |
| PCLO   | 94          | 19%        |
| PIK3CA | 93          | 18%        |
| DNAH5  | 82          | 16%        |

Total number of samples = 506

A

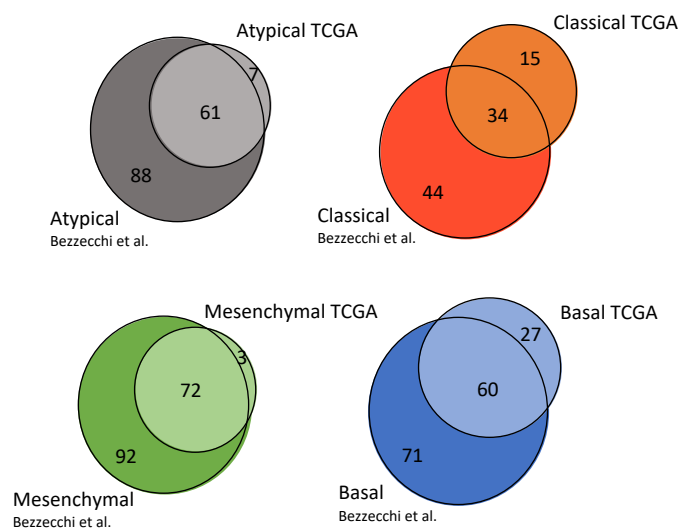

B

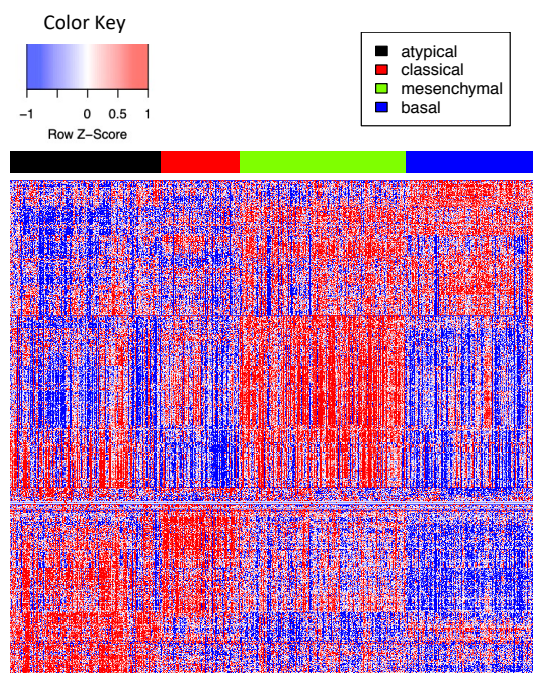

C

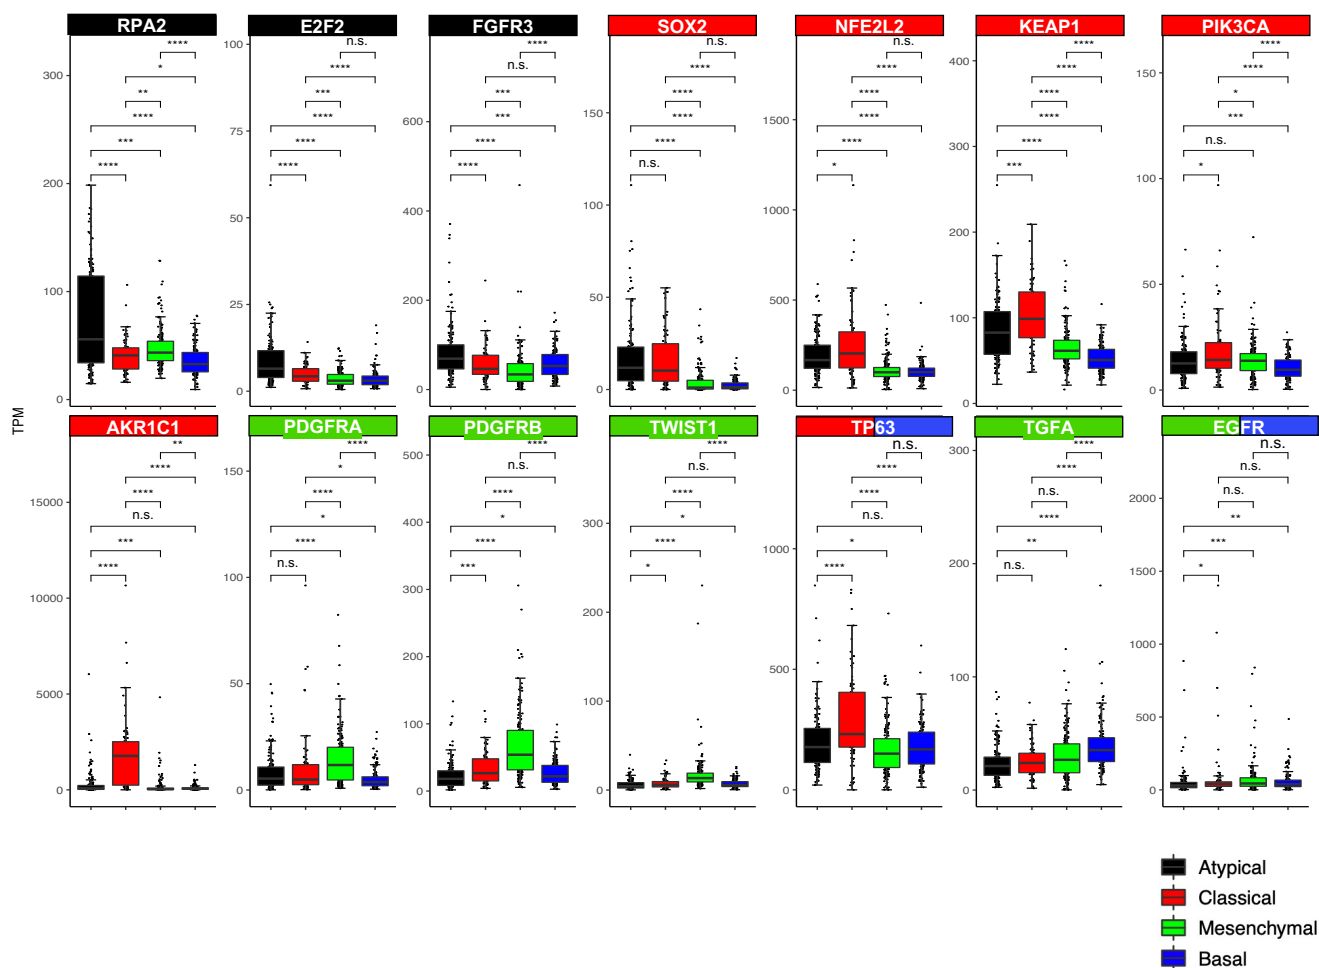

A

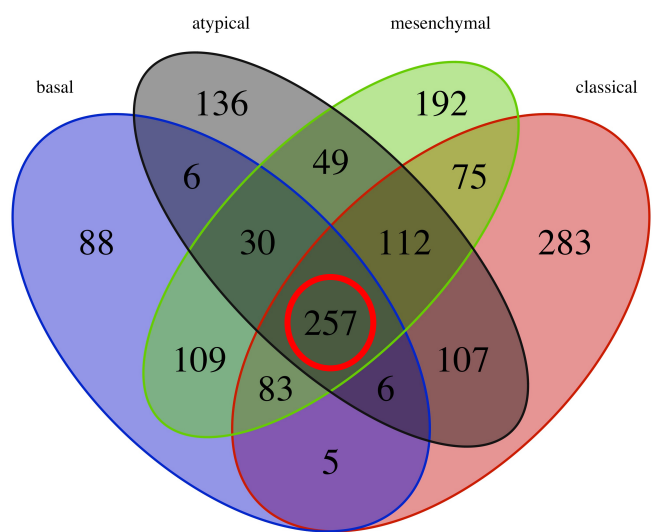

| TF_NAME       | P_VALUE                 |
|---------------|-------------------------|
| RREB1         | 6.42 x 10 <sup>-6</sup> |
| ZNF740        | 3.91 x 10 <sup>-5</sup> |
| USF1          | 4.42 x 10 <sup>-5</sup> |
| TFEB          | 9.59 x 10 <sup>-5</sup> |
| TFE3          | 1.75 x 10 <sup>-4</sup> |
| USF2          | 2.49 x 10 <sup>-4</sup> |
| MLXIPL        | 3.20 x 10 <sup>-4</sup> |
| SREBF2(var.2) | 3.53 x 10 <sup>-4</sup> |
| Srebf1(var.2) | 4.18 x 10 <sup>-4</sup> |
| MLX           | 4.36 x 10 <sup>-4</sup> |

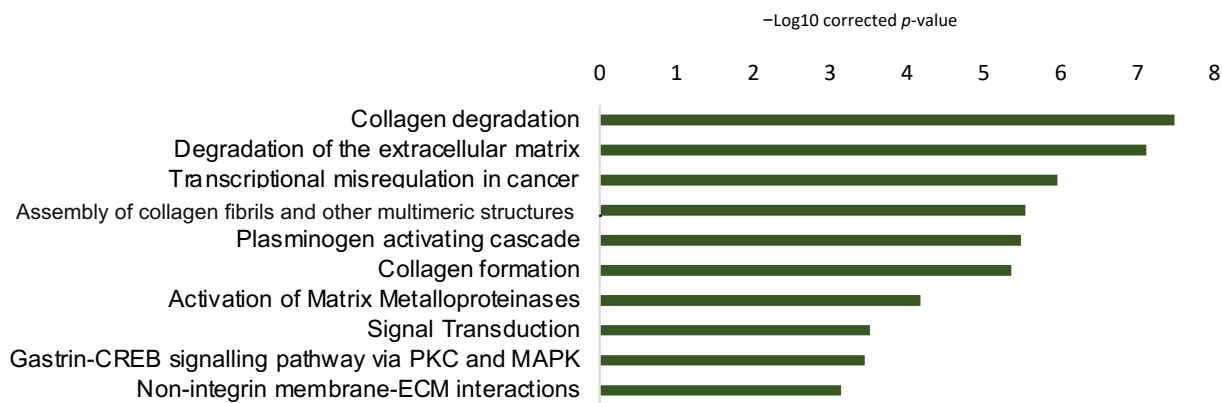

B

| TF NAME | P VALUE                 |
|---------|-------------------------|
| TCF4    | 5.33 x 10 <sup>-5</sup> |
| TCF3    | 8.74 x 10 <sup>-5</sup> |
| ID4     | 1.06 x 10 <sup>-4</sup> |
| PLAG1   | 4.19 x 10 <sup>-4</sup> |
| FIGLA   | 4.63 x 10 <sup>-4</sup> |
| SNAI2   | 1.09 x 10 <sup>-3</sup> |
| ZEB1    | 1.09 x 10 <sup>-3</sup> |
| ZNF263  | 1.45 x 10 <sup>-3</sup> |
| NFKB1   | 1.46 x 10 <sup>-3</sup> |
| TFAP2A  | 1.66 x 10 <sup>-3</sup> |

| TF NAME       | P VALUE                 |
|---------------|-------------------------|
| ZNF263        | 9.34 x 10 <sup>-8</sup> |
| MZF1(var.2)   | 3.60 x 10 <sup>-6</sup> |
| INSM1         | 5.41 x 10 <sup>-6</sup> |
| E2F6          | 2.17 x 10 <sup>-5</sup> |
| EWSR1-FLI1    | 3.92 x 10 <sup>-5</sup> |
| NFKB2         | 1.63 x 10 <sup>-4</sup> |
| E2F3          | 2.14 x 10 <sup>-4</sup> |
| SP1           | 2.24 x 10 <sup>-4</sup> |
| TFAP2A(var.2) | 2.33 x 10 <sup>-4</sup> |
| E2F4          | 4.5 x 10 <sup>-4</sup>  |

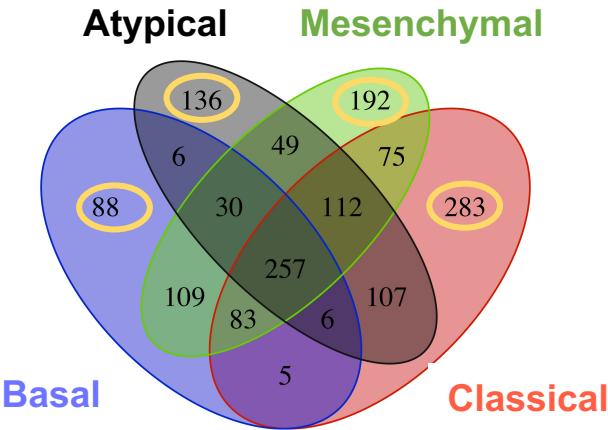

| TF NAME      | P VALUE                 |
|--------------|-------------------------|
| JUN::FOS     | 5.55 x 10 <sup>-4</sup> |
| STAT1::STAT2 | 9.26 x 10 <sup>-4</sup> |
| TBP          | 1.78 x 10 <sup>-3</sup> |
| RARA(var.2)  | 2.02 x 10 <sup>-3</sup> |
| TBP          | 2.12 x 10 <sup>-3</sup> |
| RARA::RXRA   | 3.27 x 10 <sup>-3</sup> |
| BATF::JUN    | 3.58 x 10 <sup>-3</sup> |
| STAT1        | 5.03 x 10 <sup>-3</sup> |
| NFKB1        | 5.20 x 10 <sup>-3</sup> |
| MAX          | 5.66 x 10 <sup>-3</sup> |

| TF NAME     | P VALUE                 |
|-------------|-------------------------|
| Gata1       | 8.68 x 10 <sup>-4</sup> |
| ALX3        | 2.72 x 10 <sup>-3</sup> |
| GATA1::TAL1 | 3.30 x 10 <sup>-3</sup> |
| Gata1       | 3.77 x 10 <sup>-3</sup> |
| GATA2       | 4.12 x 10 <sup>-3</sup> |
| SCRT1       | 4.35 x 10 <sup>-3</sup> |
| Gata4       | 6.41 x 10 <sup>-3</sup> |
| HNF1B       | 6.60 x 10 <sup>-3</sup> |
| MIXL1       | 7.78 x 10 <sup>-3</sup> |
| RAX2        | 8.95 x 10 <sup>-3</sup> |

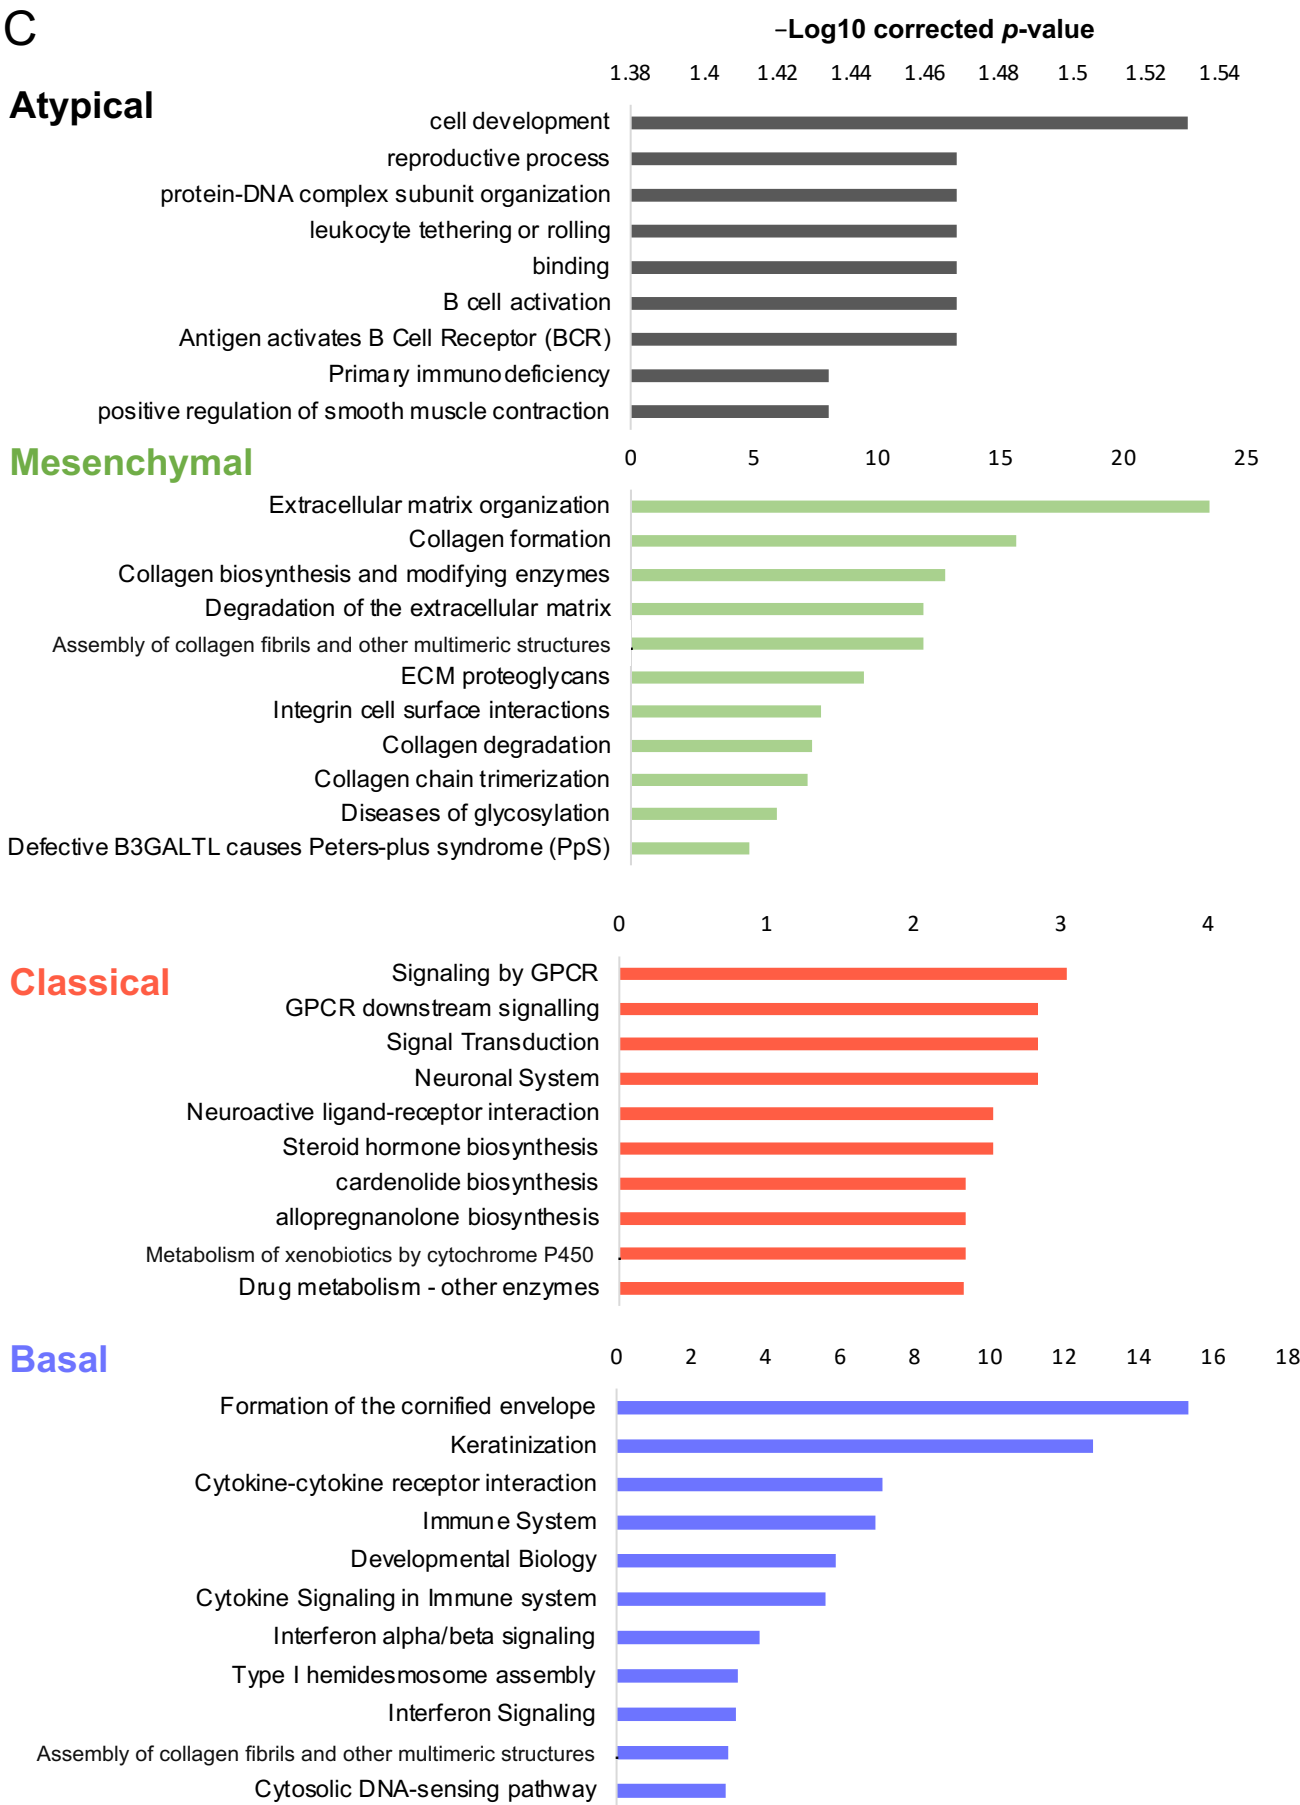

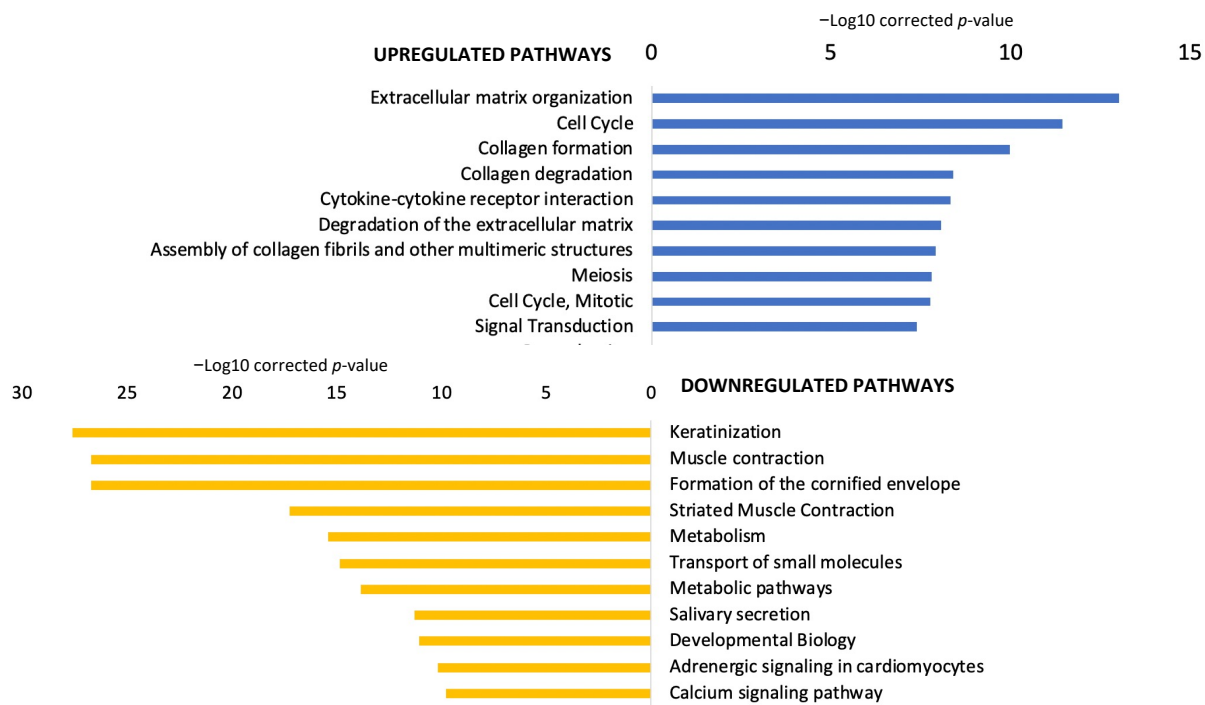

**Figure S1.** Tumor mutations in HNSCC TCGA data.

Available genetic data on 316 TCGA HNSCC were portioned according the individual mutations, as shown in the Table.

**Figure S2.** Venn diagram of the TCGA HNSCC dataset with the four subtypes previously categorized [3]. In each circle, the number with the previous partial partitioning, and the new classification presented here. **B.** Heatmap with clustering of HNSCC samples in four subtypes, according to the 838 genes centroid, kindly provided by V. Walter [3]. **C.** Box plots of relative mRNA levels of 14 marker genes typical of the four subtypes, as indicated by the color: black (Atypical), green (Mesenchymal), red (Classical), Blue (Basal).  $p$  value: n.s.>0.05, \*<0.05, \*\*<0.01, \*\*\*<0.001, \*\*\*\*<.00001.

**Figure S3.** Analysis of HNSCC subtype-specific gene expression.

**A.** Venn diagrams of Up-regulated genes in the different subtypes of HNSCC. In the right Panel, Pscan analysis of enriched TFBS in promoters of the common cohort of up-regulated genes. In the lower Panel, Reactome analysis of the up-regulated genes. **B.** Pscan analysis of enriched TFBS in promoters of the subtypes-specific up-regulated genes, as indicated by the Venn diagrams. **C.** Reactome pathways enriched in up-regulated genes in the four subtypes of HNSCC, listed according to their  $p$ -value. The list is obtained using KOBAS.

**Figure S4.** Pathways enriched in HPV tumors.

Reactome pathways enriched in HPV-positive upregulated genes (Upper Panel) and down-regulated genes (Lower Panel) listed according to their  $p$  value. The list is obtained using KOBAS.
