# Supplementary material for: NF-Y Subunits Overexpression in HNSCC
Source: MDPI journal article supplement (doi:10.3390/cancers13123019), 2021-06-16
Supplement: s1 [file s1]

Uncropped western-blot membranes

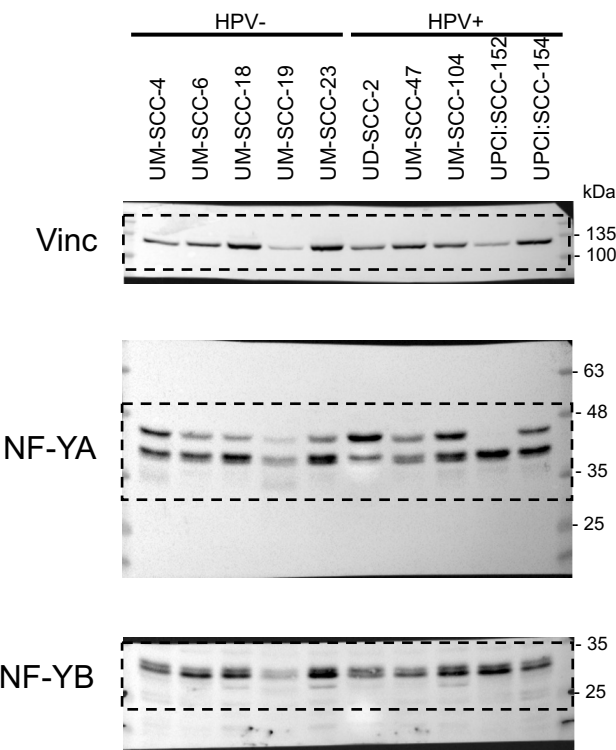

**Uncropped western blot membranes referred to Fig 3.** Each image represent the merge of the chemiluminescent signal and the colorimetric acquisition of the membrane.
